# Supplementary material
Source: Springer Nature journal article supplement (https://www.springermedizin.de/resource/supplementary/12936_2012_2165_MOESM4_ESM.pdf/9542692)
Supplement: MOESM4 [file 9542692]

## Thailand

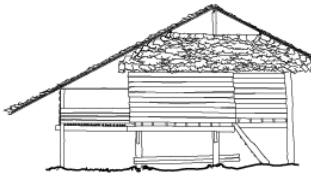

Teak house, thatched roof

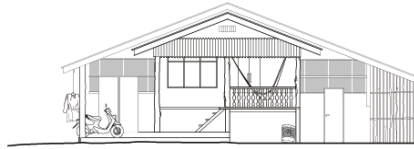

Modern wood/concrete house,  
metal roof

## Philippines

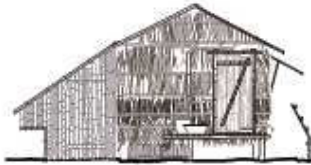

Bamboo hut, thatched roof

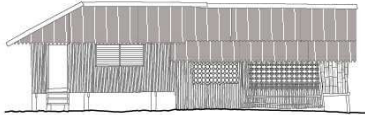

Bamboo house, metal roof

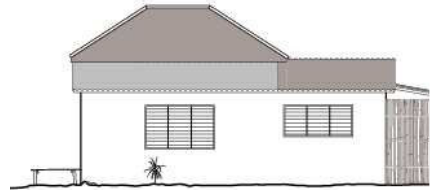

Low cost concrete house,  
metal roof

## The Gambia

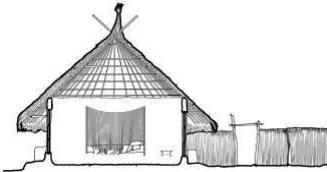

Round mud hut, thatched  
roof

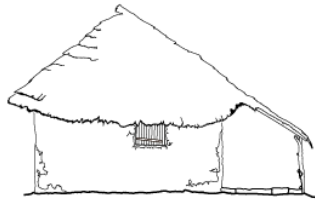

Square mud hut, thatched roof

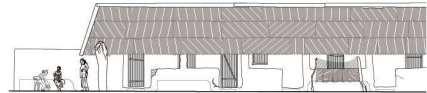

Mud brick line house,  
metal roof

## Tanzania

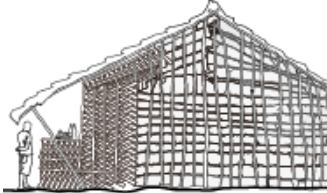

Mud hut, thatched roof

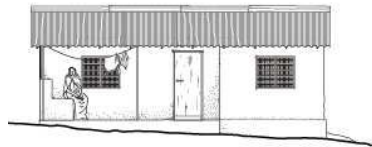

Brick house, metal roof
